# Supplementary material for: Chronic UCN2 treatment desensitizes CRHR2 and improves insulin sensitivity
Source: PubMed Central journal article supplement (PMC10319809; doi:10.1038/s41467-023-39597-w), 2023-07-04
Supplement: 41467_2023_39597_MOESM1_ESM.pdf [file 41467_2023_39597_MOESM1_ESM.pdf]

# Supplementary Fig. 1

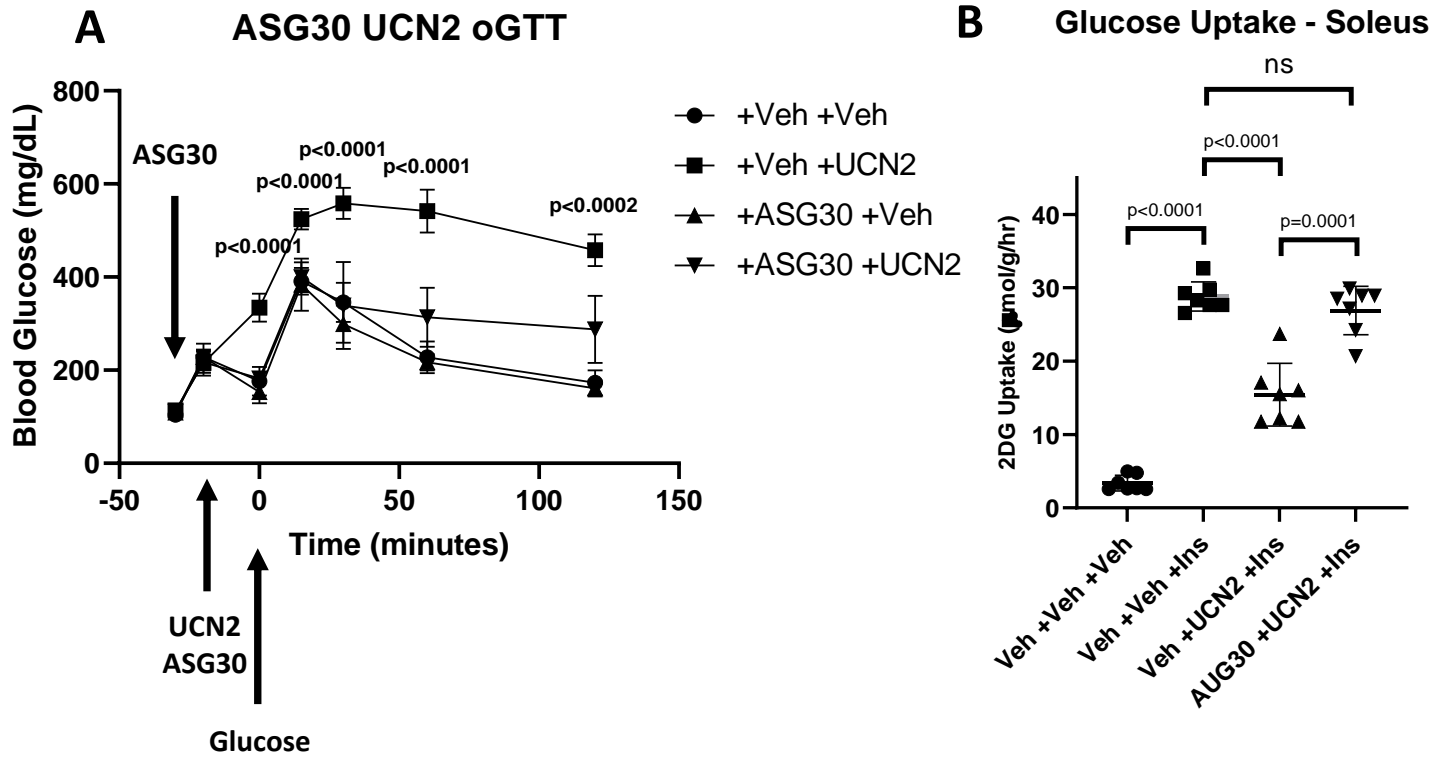

## Supplementary Fig. 1. Antisauvagine-30 Blunts Effects of UCN2 on Glucose Uptake.

- (A) Blood glucose during oGTT. Oral glucose gavage occurred at t = 0. At t = -30 animals were treated with either Antisauvagine-30 (ASG30) or water. At t = -20 animals were treated with either Saline, UCN2 alone, ASG30 alone, or ASG30 and UCN2 together. Mean±SD, n = 6. Significance was assessed by one-way ANOVA and Tukey HSD.
- (B) [<sup>3</sup>H]2-Deoxyglucose uptake by the soleus muscle in insulin-treated or untreated mice, following pre-treatment of saline, UCN2, or ASG30 and UCN2. Mean±SD, n = 6.

Significance was assessed by one-way ANOVA and Tukey HSD. \* P < 0.05, \*\* P < 0.01, \*\*\* P < 0.001, \*\*\*\* P < 0.0001.

Supplementary Fig. 2

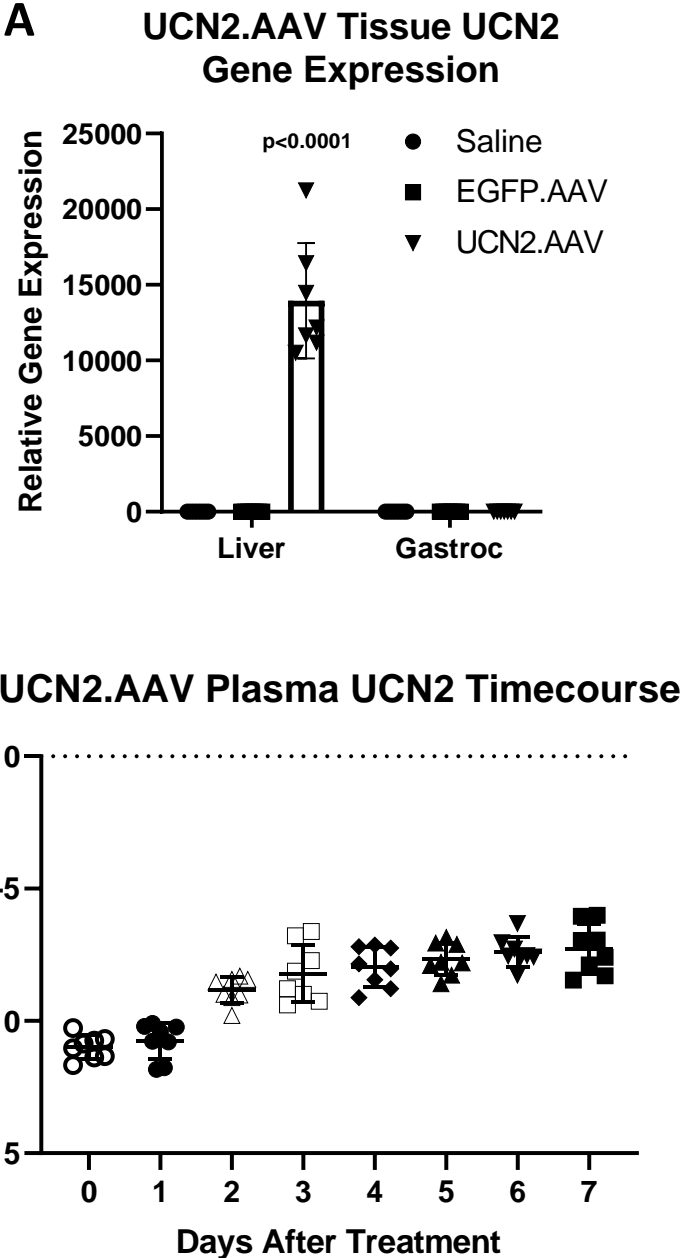

**Supplementary Fig. 2. UCN2.AAV Dosing.**

- A. *Ucn2* gene expression in liver and gastrocnemius muscle from saline-dosed, EGFP.AAV-dosed, and UCN2.AAV-dosed animals, 7 days after treatment. Mean±SD, n = 8. Significance was assessed by one-way ANOVA and Tukey HSD.
  - B. Serum UCN2 concentrations taken each day after treatment with UCN2.AAV. Mean±SD, n = 8.
- \* P < 0.05, \*\* P < 0.01, \*\*\* P < 0.001, \*\*\*\* P < 0.0001 .

# Supplementary Figure 3

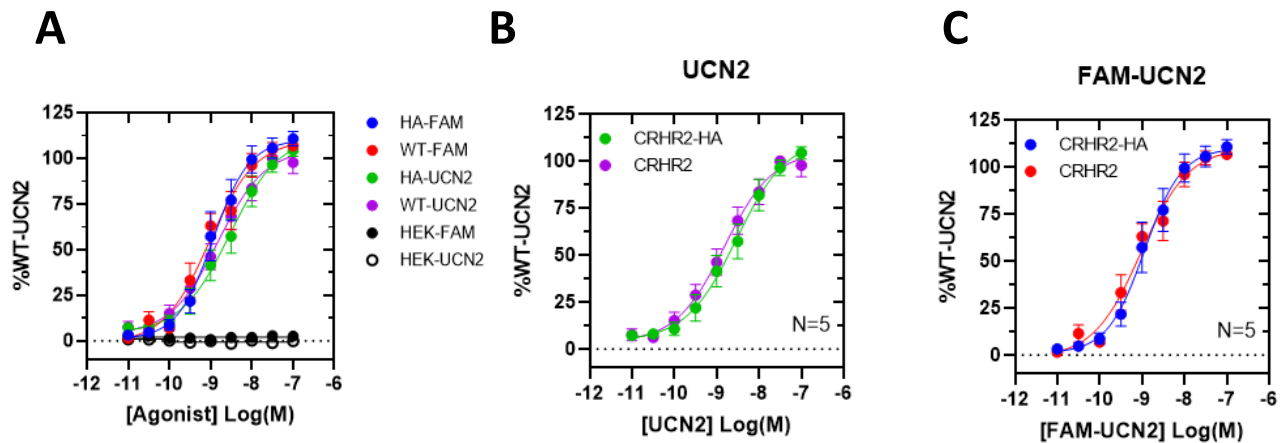

## D

|           | HA-FAM   |          |   | WT-FAM   |          |   | HA-UCN   |          |   | WT-UCN   |          |   |
|-----------|----------|----------|---|----------|----------|---|----------|----------|---|----------|----------|---|
|           | Mean     | SEM      | N | Mean     | SEM      | N | Mean     | SEM      | N | Mean     | SEM      | N |
| Bottom    | 4.3e-004 | 3.6      | 7 | 1.1      | 3.4      | 7 | 4.8      | 2.2      | 5 | 3.8      | 3.7      | 5 |
| Top       | 112.8    | 4.2      | 7 | 112.7    | 1.9      | 7 | 115.3    | 4.6      | 5 | 109.0    | 4.5      | 5 |
| LogEC50   | -9.1     | 0.2      | 7 | -9.1     | 0.2      | 7 | -8.5     | 0.2      | 5 | -8.8     | 0.2      | 5 |
| HillSlope | 1.4      | 0.2      | 7 | 1.0      | 0.2      | 7 | 0.8      | 3.3e-002 | 5 | 0.8      | 0.1      | 5 |
| EC50      | 1.4e-009 | 5.0e-010 | 7 | 1.2e-009 | 4.2e-010 | 7 | 4.6e-009 | 2.0e-009 | 5 | 2.2e-009 | 8.4e-010 | 5 |
| Span      | 112.7    | 6.5      | 7 | 111.6    | 4.3      | 7 | 110.6    | 5.3      | 5 | 105.1    | 7.4      | 5 |

### Supplementary Fig. 3. UCN2 Dose-Response Time Course.

- (A) Intensity of CRHR2 downstream signaling in response to increasing doses of recombinant human UCN2 or FAM-labeled UCN2 in reporter HEK293 cells transfected with human CRHR2. n = 1.
- (B) Intensity of CRHR2 downstream signaling in response to increasing doses of recombinant human UCN2 in reporter HEK293 cells transfected with WT human CRHR2 or HA-tagged CRHR2. n = 1.
- (C) Intensity of CRHR2 downstream signaling in response to increasing doses of FAM-labelled UCN2 in reporter HEK293 cells transfected with WT human CRHR2 or HA-tagged CRHR2. n = 1.
- (D) Dose-response curve characteristics in HEK293 cells with WT human CRHR2 (WT) or HA-tagged human CRHR2 following treatment with human recombinant UCN2 or FAM-labeled UCN2.

# Supplementary Fig. 4

**A**

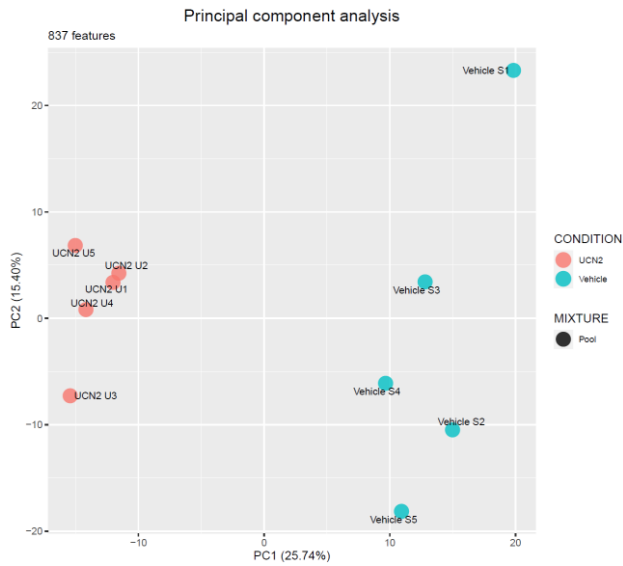

**B**

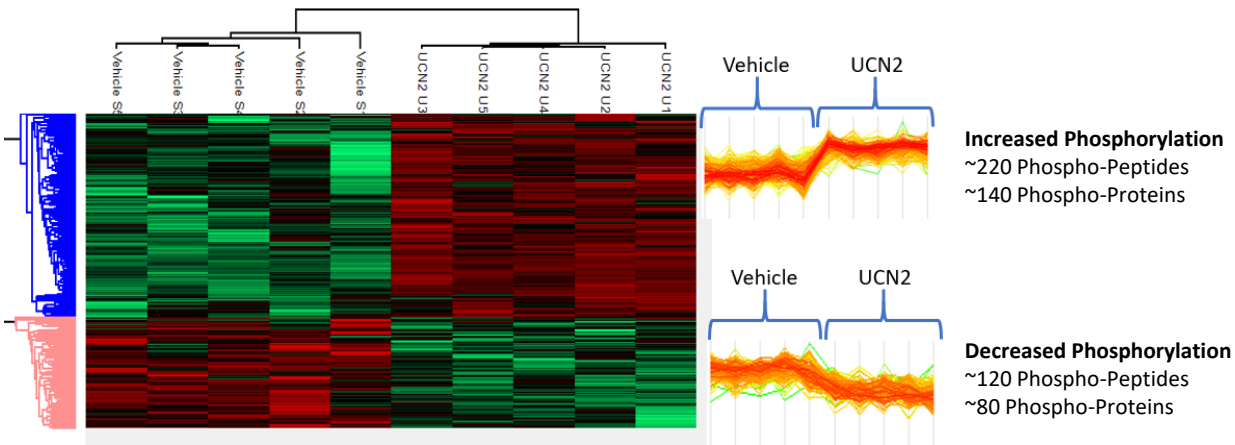

**C**

## Phosphoproteomic Pathway Analysis

### Decreased in Response to UCN2

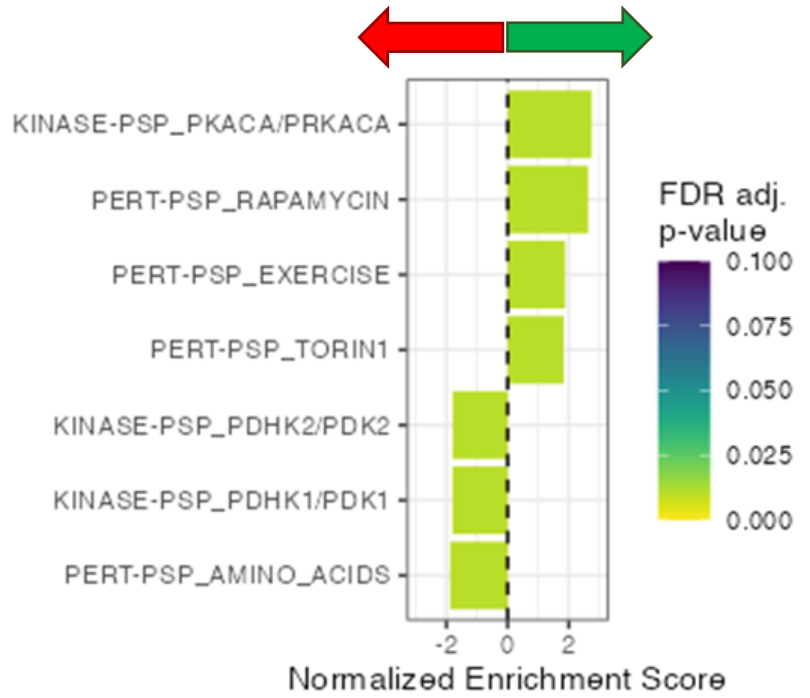

## Supplementary Fig. 4. UCN2 Gastrocnemius Muscle Phosphoproteomics.

- (A) Principal component analysis of the phosphoproteomes of saline and UCN2-treated gastrocnemius muscle. n = 5.
- (B) Heatmap of proteins phosphorylated or dephosphorylated in response to UCN2 treatment. n = 5.
- (C) Phosphoproteomic pathway analysis for saline and UCN2-treated gastrocnemius muscle. n = 5.
