# Supplementary material for: Chronic UCN2 treatment desensitizes CRHR2 and improves insulin sensitivity
Source: PubMed Central journal article supplement (PMC10319809; doi:10.1038/s41467-023-39597-w), 2023-07-04
Supplement: 41467_2023_39597_MOESM2_ESM.pdf [file 41467_2023_39597_MOESM2_ESM.pdf]

## **Description of Additional Supplementary Files**

### **Supplementary Movie 1**

Confocal microscopy of live HEK293 cells, transfected with human CRHR2 and treated with FAM-UCN2 over 24 hours. Blue = Hoescht (nuclei), Red = Lysostracker (acidic compartments), and Green = FAM-UCN2. Scale bars = 10 $\mu$ m.

### **Supplementary Movie 2**

Confocal microscopy of live HEK293 cells, transfected with human CRHR2 and treated with FAM-UCN2 over 24 hours. Blue = Hoescht (nuclei), Red = Lysostracker (acidic compartments), and Green = FAM-UCN2. Scale bars = 10 $\mu$ m.

### **Supplementary Movie 3**

Confocal microscopy of live WT HEK293 cells treated with FAM-UCN2 over 24 hours. Blue = Hoescht (nuclei), Red = Lysostracker (acidic compartments), and Green = FAM-UCN2. Scale bars = 10 $\mu$ m.

### **Supplementary Movie 4**

Confocal microscopy of live HEK293 cells, transfected with human CRHR2 and treated with saline over 24 hours. Blue = Hoescht (nuclei), Red = Lysostracker (acidic compartments), and Green = FAM-UCN2. Scale bars = 10 $\mu$ m.
